# Supplementary material for: Evaluation of the Sensititre YeastOne and Etest in Comparison with CLSI M38-A2 for Antifungal Susceptibility Testing of Three Azoles, Amphotericin B, Caspofungin, and Anidulafungin, against Aspergillusfumigatus and Other Species, Using New Clinical Breakpoints and Epidemiological Cutoff Values
Source: MDPI journal article supplement (doi:10.3390/pharmaceutics14102161), 2022-10-11
Supplement: s1 [file s1]

Supplementary Material: Table S1. Database on 106 clinical *Aspergillus* spp. isolates according to MIC (mg/L) results using two commercial methods and CLSI broth microdilution method

| Database on 106 clinical <i>Aspergillus</i> spp. isolates according to MIC (mg/L) results using two commercial methods and CLSI broth microdilution method |                      |              |              |              |              |              |              |              |              |              |              |              |              |              |              |
|------------------------------------------------------------------------------------------------------------------------------------------------------------|----------------------|--------------|--------------|--------------|--------------|--------------|--------------|--------------|--------------|--------------|--------------|--------------|--------------|--------------|--------------|
| Isolates                                                                                                                                                   | Spp.                 | BMD-CLSI pos | BMD-CLSI neg |
| 1                                                                                                                                                          | <i>A. fumigatus</i>  | 0.12         | 0.5          | 2            | 0.5          | 0.25         | ND           | ND           | ND           | 0.25         | ND           | 0.25         | ND           | 0.25         | ND           |
| 2                                                                                                                                                          | <i>A. niger</i>      | 0.5          | 0.5          | 0.06         | 0.5          | 0.25         | 0.01         | 0.125        | 0.38         | 0.023        | 0.012        | 0.002        | ND           | ND           | ND           |
| 3                                                                                                                                                          | <i>A. fumigatus</i>  | 0.12         | 0.5          | 0.5          | 2            | 0.25         | 0.001        | 0.25         | 0.5          | 0.002        | 1            | 0.002        | 0.2          | 0.5          | 2            |
| 4                                                                                                                                                          | <i>A. fumigatus</i>  | 0.12         | 0.5          | 0.5          | 0.5          | 0.25         | 0.015        | 0.75         | 0.5          | ND           | 0.5          | 0.002        | 0.06         | 0.5          | 0.12         |
| 5                                                                                                                                                          | <i>A. fumigatus</i>  | 0.12         | 0.5          | 0.5          | 0.5          | 0.125        | 0.5          | 0.125        | 0.75         | 0.0125       | 6            | ND           | ND           | ND           | ND           |
| 6                                                                                                                                                          | <i>A. fumigatus</i>  | 0.12         | 0.5          | 1            | 0.5          | 0.25         | 0.09         | 0.25         | 2            | 0.094        | 0.38         | ND           | 0.12         | 0.5          | 0.5          |
| 7                                                                                                                                                          | <i>A. fumigatus</i>  | 0.25         | 0.5          | 0.25         | 0.5          | 0.25         | ND           | 0.38         | 6            | ND           | 0.38         | ND           | 0.25         | 0.5          | 1            |
| 8                                                                                                                                                          | <i>A. fumigatus</i>  | 0.06         | 1            | 2            | 0.5          | 0.5          | ND           | ND           | ND           | ND           | 0.25         | ND           | 0.5          | 0.25         | 2            |
| 9                                                                                                                                                          | <i>A. fumigatus</i>  | 0.12         | 0.5          | 0.5          | 0.5          | 0.5          | 0.001        | 0.125        | 1            | ND           | 0.5          | ND           | 0.5          | 0.06         | 0.5          |
| 10                                                                                                                                                         | <i>A. fumigatus</i>  | 0.12         | 0.5          | 0.5          | 0.5          | 0.12         | ND           | ND           | ND           | ND           | 0.002        | ND           | 0.12         | 0.25         | 0.25         |
| 11                                                                                                                                                         | <i>A. fumigatus</i>  | 0.25         | 0.5          | 1            | 0.5          | 0.25         | ND           | ND           | 1            | 0.047        | 0.19         | ND           | ND           | ND           | ND           |
| 12                                                                                                                                                         | <i>A. fumigatus</i>  | 0.12         | 0.5          | 0.5          | 1            | 0.5          | 0.5          | ND           | 0.04         | 0.19         | 0.38         | ND           | ND           | ND           | ND           |
| 13                                                                                                                                                         | <i>A. fumigatus</i>  | 0.25         | 0.5          | 0.25         | 0.5          | 0.25         | 0.19         | 0.06         | 0.094        | 15           | ND           | 0.12         | 0.5          | 0.25         | 2            |
| 14                                                                                                                                                         | <i>A. fumigatus</i>  | 0.12         | 0.25         | 0.06         | 0.5          | 0.25         | ND           | 0.06         | ND           | 0.047        | ND           | ND           | ND           | ND           | ND           |
| 15                                                                                                                                                         | <i>A. fumigatus</i>  | 0.12         | 0.25         | 0.5          | 0.25         | 0.5          | 0.003        | 0.125        | 1            | ND           | 0.002        | 0.02         | 0.5          | 1            | 0.5          |
| 16                                                                                                                                                         | <i>A. flavus</i>     | 0.12         | 0.5          | 0.5          | 0.5          | 0.12         | ND           | ND           | ND           | 0.19         | ND           | ND           | 0.12         | 0.5          | 0.25         |
| 17                                                                                                                                                         | <i>A. fumigatus</i>  | 0.12         | 0.5          | 2            | 2            | 0.25         | 0.003        | 1            | 15           | ND           | 0.75         | 0.002        | 0.25         | 0.12         | 8            |
| 18                                                                                                                                                         | <i>A. fumigatus</i>  | 0.12         | 0.5          | 1            | 0.5          | 0.5          | 0.19         | 0.5          | ND           | 15           | 0.003        | 0.12         | 0.12         | 0.12         | 2            |
| 19                                                                                                                                                         | <i>A. fumigatus</i>  | 0.25         | 0.5          | 0.5          | 1            | 0.5          | ND           | 0.19         | 0.75         | 0.032        | 0.5          | ND           | 0.12         | 0.5          | 0.25         |
| 20                                                                                                                                                         | <i>A. fumigatus</i>  | 0.12         | 0.25         | 0.5          | 0.5          | 1            | 0.007        | 1.5          | 1            | ND           | 0.5          | 0.002        | 0.5          | 0.5          | 0.25         |
| 21                                                                                                                                                         | <i>A. fumigatus</i>  | 0.12         | ND           | 1            | 0.25         | 0.5          | ND           | ND           | 0.125        | ND           | 0.064        | ND           | ND           | ND           | ND           |
| 22                                                                                                                                                         | <i>A. fumigatus</i>  | 0.12         | 0.5          | 0.5          | 0.5          | 0.003        | 0.125        | 15           | ND           | 0.002        | 0.002        | ND           | ND           | ND           | ND           |
| 23                                                                                                                                                         | <i>A. fumigatus</i>  | 0.12         | 0.5          | 0.25         | 0.5          | 0.25         | ND           | 0.25         | ND           | 0.25         | ND           | ND           | ND           | ND           | ND           |
| 24                                                                                                                                                         | <i>A. fumigatus</i>  | 0.12         | 0.5          | 1            | 0.5          | 0.5          | ND           | ND           | 1            | ND           | 0.004        | ND           | 0.06         | 0.25         | 0.25         |
| 25                                                                                                                                                         | <i>A. fumigatus</i>  | 0.12         | 0.25         | 0.12         | 0.25         | 0.25         | ND           | 0.19         | 0.5          | 0.002        | 0.38         | ND           | ND           | ND           | ND           |
| 26                                                                                                                                                         | <i>A. fumigatus</i>  | 0.25         | 0.5          | 0.12         | 1            | 0.25         | 0.003        | 0.125        | 0.5          | 0.064        | 0.75         | ND           | 0.12         | 0.5          | 0.25         |
| 27                                                                                                                                                         | <i>A. flavus</i>     | 0.12         | 0.5          | 0.125        | 2            | 0.5          | 0.013        | 0.125        | 15           | ND           | 32           | 0.02         | 0.12         | 0.25         | 1            |
| 28                                                                                                                                                         | <i>A. flavus</i>     | 0.12         | 0.06         | 0.5          | 0.5          | 0.002        | 0.06         | 0.25         | 0.5          | ND           | 0.25         | 0.12         | 0.25         | 0.5          | 2            |
| 29                                                                                                                                                         | <i>A. fumigatus</i>  | 0.12         | 1            | 0.5          | 0.5          | 0.5          | ND           | 0.38         | 1            | ND           | 0.19         | ND           | ND           | ND           | ND           |
| 30                                                                                                                                                         | <i>A. fumigatus</i>  | 0.12         | 0.5          | 0.5          | 0.25         | 0.25         | 0.19         | 0.2          | 0.094        | ND           | 0.25         | ND           | ND           | ND           | ND           |
| 31                                                                                                                                                         | <i>A. fumigatus</i>  | 0.12         | 0.25         | 0.5          | 0.5          | 0.5          | ND           | 0.125        | 0.75         | 0.125        | 0.047        | ND           | ND           | ND           | ND           |
| 32                                                                                                                                                         | <i>A. fumigatus</i>  | 0.5          | 1            | 8            | 0.5          | 0.12         | ND           | 0.25         | 0.75         | 0.094        | 0.125        | ND           | ND           | ND           | ND           |
| 33                                                                                                                                                         | <i>A. fumigatus</i>  | 0.25         | 2            | 0.06         | 0.25         | 1            | 0.015        | 0.05         | 0.175        | 0.5          | 0.004        | 0.002        | 0.5          | 0.5          | 2            |
| 34                                                                                                                                                         | <i>A. fumigatus</i>  | 0.12         | 0.5          | 0.5          | 0.5          | 0.5          | ND           | ND           | ND           | ND           | 0.25         | ND           | ND           | ND           | ND           |
| 35                                                                                                                                                         | <i>A. fumigatus</i>  | 0.12         | 0.5          | 1            | 0.25         | 0.25         | ND           | 0.19         | 0.75         | ND           | 3            | ND           | 0.75         | ND           | ND           |
| 36                                                                                                                                                         | <i>A. niger</i>      | 0.25         | 0.5          | 1            | 0.25         | 0.25         | ND           | 0.25         | 2            | ND           | 0.38         | ND           | ND           | ND           | ND           |
| 37                                                                                                                                                         | <i>A. niger</i>      | 0.12         | 0.5          | 1            | 0.5          | 0.25         | ND           | ND           | ND           | ND           | 0.38         | ND           | ND           | ND           | ND           |
| 38                                                                                                                                                         | <i>A. fumigatus</i>  | 0.12         | 0.5          | 1            | 0.5          | 0.5          | ND           | 0.125        | 0.5          | ND           | 0.006        | ND           | ND           | ND           | ND           |
| 39                                                                                                                                                         | <i>A. fumigatus</i>  | 0.12         | 0.25         | 2            | 1            | 0.5          | 0.001        | 0.09         | 15           | ND           | 0.19         | ND           | 0.25         | 0.5          | 0.12         |
| 40                                                                                                                                                         | <i>A. fumigatus</i>  | 0.06         | 0.5          | 1            | 0.5          | 0.5          | ND           | ND           | ND           | 15           | ND           | 0.002        | 0.25         | 0.06         | 1            |
| 41                                                                                                                                                         | <i>A. fumigatus</i>  | 0.25         | 1            | 1            | 2            | 0.5          | 0.003        | 0.125        | 0.38         | ND           | 2            | ND           | 0.12         | 0.5          | 0.25         |
| 42                                                                                                                                                         | <i>A. fumigatus</i>  | 0.12         | 0.5          | 1            | 0.5          | 0.5          | ND           | 0.25         | 0.5          | ND           | 0.023        | ND           | ND           | ND           | ND           |
| 43                                                                                                                                                         | <i>A. fumigatus</i>  | 0.12         | 0.5          | 1            | 0.25         | 0.5          | ND           | 0.19         | 1            | 0.002        | ND           | ND           | ND           | ND           | ND           |
| 44                                                                                                                                                         | <i>A. fumigatus</i>  | 0.12         | 0.5          | 0.25         | 0.5          | 0.25         | ND           | ND           | ND           | ND           | 0.19         | ND           | ND           | ND           | ND           |
| 45                                                                                                                                                         | <i>A. fumigatus</i>  | 0.12         | 0.5          | 0.25         | 0.5          | 0.25         | ND           | ND           | ND           | ND           | 0.006        | ND           | ND           | ND           | ND           |
| 46                                                                                                                                                         | <i>A. fumigatus</i>  | 0.12         | 1            | 0.5          | 1            | 0.25         | ND           | 0.19         | 15           | 0.047        | 2            | ND           | ND           | ND           | ND           |
| 47                                                                                                                                                         | <i>A. clavatus</i>   | 0.12         | 2            | 1            | 1            | 0.5          | 0.003        | 1            | 1            | ND           | 0.004        | 0.002        | 0.5          | 1            | 1            |
| 48                                                                                                                                                         | <i>A. fumigatus</i>  | 0.12         | 1            | 1            | 0.5          | 0.5          | ND           | ND           | ND           | ND           | 0.38         | ND           | ND           | ND           | ND           |
| 49                                                                                                                                                         | <i>A. fumigatus</i>  | 0.12         | 0.5          | 1            | 0.25         | 0.25         | ND           | 0.19         | 0.5          | 0.002        | 0.38         | ND           | ND           | ND           | ND           |
| 50                                                                                                                                                         | <i>A. fumigatus</i>  | 0.12         | 0.25         | 0.25         | 0.5          | 0.5          | ND           | 0.125        | 0.75         | 0.002        | 0.125        | 0.002        | 0.5          | 0.5          | 1            |
| 51                                                                                                                                                         | <i>A. fumigatus</i>  | 0.12         | 0.5          | 1            | 0.25         | 0.5          | ND           | ND           | ND           | ND           | 0.19         | ND           | ND           | ND           | ND           |
| 52                                                                                                                                                         | <i>A. clavatus</i>   | 0.25         | 0.5          | 1            | 0.3          | 1            | ND           | ND           | ND           | 0.012        | 0.19         | ND           | ND           | ND           | ND           |
| 53                                                                                                                                                         | <i>A. fumigatus</i>  | 0.12         | 0.5          | 0.25         | 1            | 0.19         | 0.5          | 0.125        | 0.38         | ND           | 0.5          | 0.25         | 0.5          | 0.25         | 8            |
| 54                                                                                                                                                         | <i>A. fumigatus</i>  | 0.25         | 1            | 1            | 0.5          | 0.003        | 0.75         | 1            | ND           | 0.25         | 0.002        | ND           | ND           | ND           | ND           |
| 55                                                                                                                                                         | <i>A. clavatus</i>   | 0.12         | 2            | 0.5          | 1            | 0.5          | 1            | 0.003        | 0.5          | 0.004        | 0.1          | ND           | ND           | ND           | ND           |
| 56                                                                                                                                                         | <i>A. flavus</i>     | 0.12         | 0.5          | 0.25         | 0.5          | 0.25         | ND           | ND           | 0.75         | ND           | 0.75         | ND           | 0.12         | 0.5          | 0.25         |
| 57                                                                                                                                                         | <i>A. fumigatus</i>  | 0.12         | 0.5          | 0.5          | 0.5          | 0.5          | ND           | ND           | ND           | ND           | 0.25         | ND           | ND           | ND           | ND           |
| 58                                                                                                                                                         | <i>A. fumigatus</i>  | 0.12         | 0.125        | 0.25         | 0.25         | 0.25         | ND           | ND           | 2            | ND           | 0.38         | ND           | 0.25         | 0.25         | 8            |
| 59                                                                                                                                                         | <i>A. fumigatus</i>  | 0.12         | 0.5          | 1            | 1            | 0.5          | ND           | 0.25         | 2            | 0.064        | 0.125        | ND           | 0.06         | 4            | 8            |
| 60                                                                                                                                                         | <i>A. fumigatus</i>  | 0.06         | 0.5          | 0.25         | 1            | 0.5          | ND           | ND           | 1.5          | ND           | 1            | ND           | 0.25         | 0.25         | 0.25         |
| 61                                                                                                                                                         | <i>A. fumigatus</i>  | 0.12         | 0.5          | 0.5          | 1            | 1            | ND           | ND           | ND           | 0.064        | 0.38         | ND           | 0.12         | 0.5          | 0.25         |
| 62                                                                                                                                                         | <i>A. niger</i>      | 0.12         | 0.5          | 0.5          | 0.5          | 0.5          | ND           | ND           | ND           | ND           | 1            | ND           | ND           | ND           | ND           |
| 63                                                                                                                                                         | <i>A. fumigatus</i>  | 0.5          | 0.25         | 0.5          | 0.5          | 0.5          | ND           | ND           | ND           | ND           | 0.25         | ND           | 0.5          | 1            | 0.5          |
| 64                                                                                                                                                         | <i>A. fumigatus</i>  | 0.25         | 0.5          | 0.25         | 0.5          | 0.19         | 0.015        | 0.19         | 15           | 0.047        | 0.25         | 0.002        | 0.12         | 1            | 0.25         |
| 65                                                                                                                                                         | <i>A. fumigatus</i>  | 0.12         | 1            | 0.5          | 1            | 0.5          | 0.015        | 0.19         | 1            | 0.094        | 1            | 0.001        | ND           | ND           | ND           |
| 66                                                                                                                                                         | <i>A. fumigatus</i>  | 0.12         | 0.5          | 1            | 1            | 0.5          | ND           | ND           | ND           | 0.064        | 0.003        | ND           | ND           | ND           | ND           |
| 67                                                                                                                                                         | <i>A. fumigatus</i>  | 0.12         | 0.5          | 0.5          | 0.5          | 0.25         | 0.003        | 0.125        | 1            | 0.064        | 0.75         | 0.003        | ND           | ND           | ND           |
| 68                                                                                                                                                         | <i>A. versicolor</i> | 0.12         | 0.5          | 1            | 0.5          | 0.5          | ND           | 0.125        | 0.75         | 0.064        | 0.38         | ND           | 0.12         | 0.25         | 0.5          |
| 69                                                                                                                                                         | <i>A. fumigatus</i>  | 0.25         | 0.5          | 0.06         | 0.5          | 0.5          | ND           | 0.19         | 1            | ND           | 1            | ND           | 0.12         | 0.5          | 0.5          |
| 70                                                                                                                                                         | <i>A. fumigatus</i>  | 0.12         | 0.5          | 0.5          | 0.5          | 0.5          | 0.01         | 0.25         | 0.75         | 0.047        | 0.75         | 0.002        | ND           | ND           | ND           |
| 71                                                                                                                                                         | <i>A. fumigatus</i>  | 0.12         | 0.25         | 0.5          | 0.3          | 0.5          | ND           | ND           | ND           | 0.094        | ND           | ND           | ND           | ND           | ND           |
| 72                                                                                                                                                         | <i>A. niger</i>      | 0.25         | 0.25         | 1            | 0.5          | 0.5          | ND           | ND           | 1.5          | ND           | 0.002        | ND           | 0.25         | 0.5          | 0.5          |
| 73                                                                                                                                                         | <i>A. clavatus</i>   | 0.12         | 2            | 0.25         | 0.25         | 0.25         | 1.5          | 0.5          | 0.047        | 0.5          | 0.002        | 0.12         | 0.5          | 0.25         | 2            |
| 74                                                                                                                                                         | <i>A. flavus</i>     | 0.06         | 0.5          | 0.5          | 0.25         | 0.5          | ND           | ND           | ND           | ND           | 0.19         | ND           | 0.12         | 0.5          | 0.5          |
| 75                                                                                                                                                         | <i>A. fumigatus</i>  | 0.12         | 0.5          | 2            | 1            | 0.5          | 0.015        | 0.25         | 0.75         | 0.047        | 1.5          | 0.002        | 0.12         | 0.5          | 0.25         |
| 76                                                                                                                                                         | <i>A. fumigatus</i>  | 0.5          | 0.5          | 1            | 1            | 1            | ND           | ND           | 0.032        | 0.38         | ND           | 0.12         | 0.5          | 0.25         | 2            |
| 77                                                                                                                                                         | <i>A. fumigatus</i>  | 0.5          | 1            | 0.5          | 0.5          | 0.5          | 0.015        | 0.19         | 0.5          | 0.094        | 0.25         | 0.002        | 0.06         | 0.12         | 0.25         |
| 78                                                                                                                                                         | <i>A. fumigatus</i>  | 0.12         | 0.25         | 0.5          | 1            | 0.12         | 0.19         | 1.5          | 0.064        | 1            | 0.002        | 0.12         | 0.25         | 0.25         | 1            |
| 79                                                                                                                                                         | <i>A. fumigatus</i>  | 0.12         | 1            | 0.5          | 0.5          | 0.5          | ND           | 0.19         | 1            | 0.047        | 0.002        | ND           | ND           | ND           | ND           |
| 80                                                                                                                                                         | <i>A. fumigatus</i>  | 0.12         | 0.25         | 0.5          | 1            | 0.12         | ND           | ND           | ND           | 0.75         | ND           | 0.12         | 0.5          | 0.25         | 2            |
| 81                                                                                                                                                         | <i>A. flavus</i>     | 0.25         | ND           | 0.12         | 0.5          | 0.5          | 0.015        | 0.125        | 1            | ND           | 0.38         | 0.002        | 0.12         | 0.5          | 0.5          |
| 82                                                                                                                                                         | <i>A. niger</i>      | 0.12         | 0.5          | 0.25         | 0.5          | 0.5          | 0.003        | 0.25         | 2            | 0.125        | 1.5          | 0.002        | ND           | ND           | ND           |
| 83                                                                                                                                                         | <i>A. fumigatus</i>  | 0.25         | 0.5          | 1            | 0.5          | 1            | ND           | ND           | ND           | 1            | ND           | 0.25         | 1            | 0.5          | 2            |
| 84                                                                                                                                                         | <i>A. fumigatus</i>  | 0.12         | 1            | 2            | 0.25         | 0.003        | 0.25         | 0.25         | 0.75         | 0.047        | 15           | 0.002        | 0.12         | 0.5          | 0.25         |
| 85                                                                                                                                                         | <i>A. fumigatus</i>  | 0.25         | 0.5          | 0.5          | 0.5          | 0.5          | ND           | 0.25         | 1            | ND           | 0.8          | 0.002        | 0.12         | 0.5          | 0.5          |
| 86                                                                                                                                                         | <i>A. fumigatus</i>  | 0.12         | 0.5          | 1            | 0.25         | 0.001        | 0.19         | 1            | 0.032        | 0.5          | 0.002        | 0.12         | 0.5          | 0.5          | 2            |
| 87                                                                                                                                                         | <i>A. fumigatus</i>  | 0.12         | 0.5          | 0.5          | 0.5          | 0.5          | ND           | 0.5          | 1            | ND           | 0.5          | 0.004        | 0.25         | 0.5          | 0.25         |
| 88                                                                                                                                                         | <i>A. fumigatus</i>  | 0.12         | 0.25         | 0.25         | 0.5          | 0.5          | ND           | ND           | 0.5          | 0.004        | ND           | 0.12         | 0.5          | 0.25         | 2            |
| 89                                                                                                                                                         | <i>A. niger</i>      | 0.12         | 0.5          | 1            | 1            | 0.25         | ND           | ND           | 1.5          | ND           | 0.25         | ND           | 0.25         | 1            | 0.5          |
| 90                                                                                                                                                         | <i>A. niger</i>      | 0.25         | 0.5          | 1            | 1            | 0.5          | ND           | ND           | ND           | 0.047        | ND           | ND           | ND           | ND           | ND           |
| 91                                                                                                                                                         | <i>A. fumigatus</i>  | 0.12         | 1            | 0.25         | 0.5          | 0.25         | ND           | 0.25         | 15           | ND           | 0.094        | ND           |              |              |              |
